# Supplementary material
Source: PubMed Central journal article supplement (PMC7533679)
Supplement: pnas.2004087117.sapp.pdf [file pnas.2004087117.sapp.pdf]

# PNAS

[www.pnas.org](http://www.pnas.org)

**Supplementary Information for**

Netrin1 Deficiency Activates MST1 via UNC5B Receptor, Promoting Dopaminergic Apoptosis in Parkinson's Disease

Eun Hee Ahn, Seong Su Kang, Qi Qi, Xia Liu, Patrick Mehlen and Keqiang Ye \*

Email: [kye@emory.edu](mailto:kye@emory.edu)

**This PDF file includes:**

Figures S1 to S7

Figure Legends for Figures S1 to S7

**Supplementary Information Text**  
**Fig. S1.**

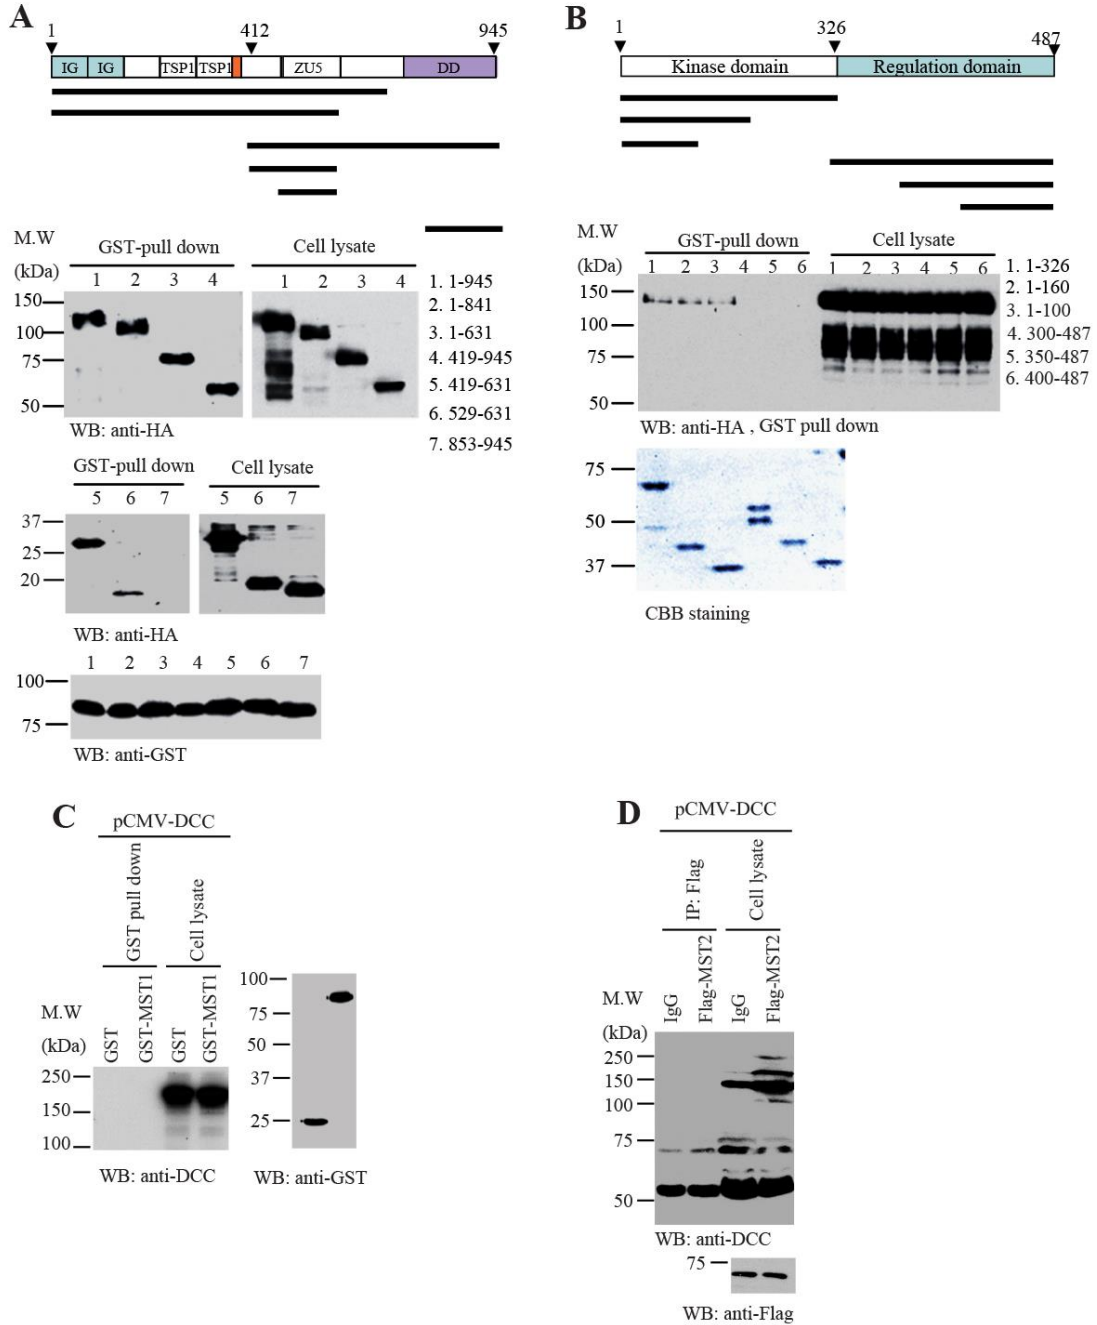

**Fig. S1. UNC5B binds to MST1.**

**(A and B)** The mapping of the domains on UNC5B receptor and MST1 for the specific interaction sites. Diagrams of UNC5B and MST1 were shown in the A&B top panels. GST pulldown assays showed that UNC5B 419-945 fragment interacted with MST1 of kinase domain (a.a.1-326) (the middle 2-3<sup>rd</sup> panels).

**(C and D)** DCC does not bind to MST1 or MST2. Immunoprecipitation representative images showed that DCC did not interact with either MST1 or 2. Three independent studies were conducted in all of experiments.

**Fig. S2.**

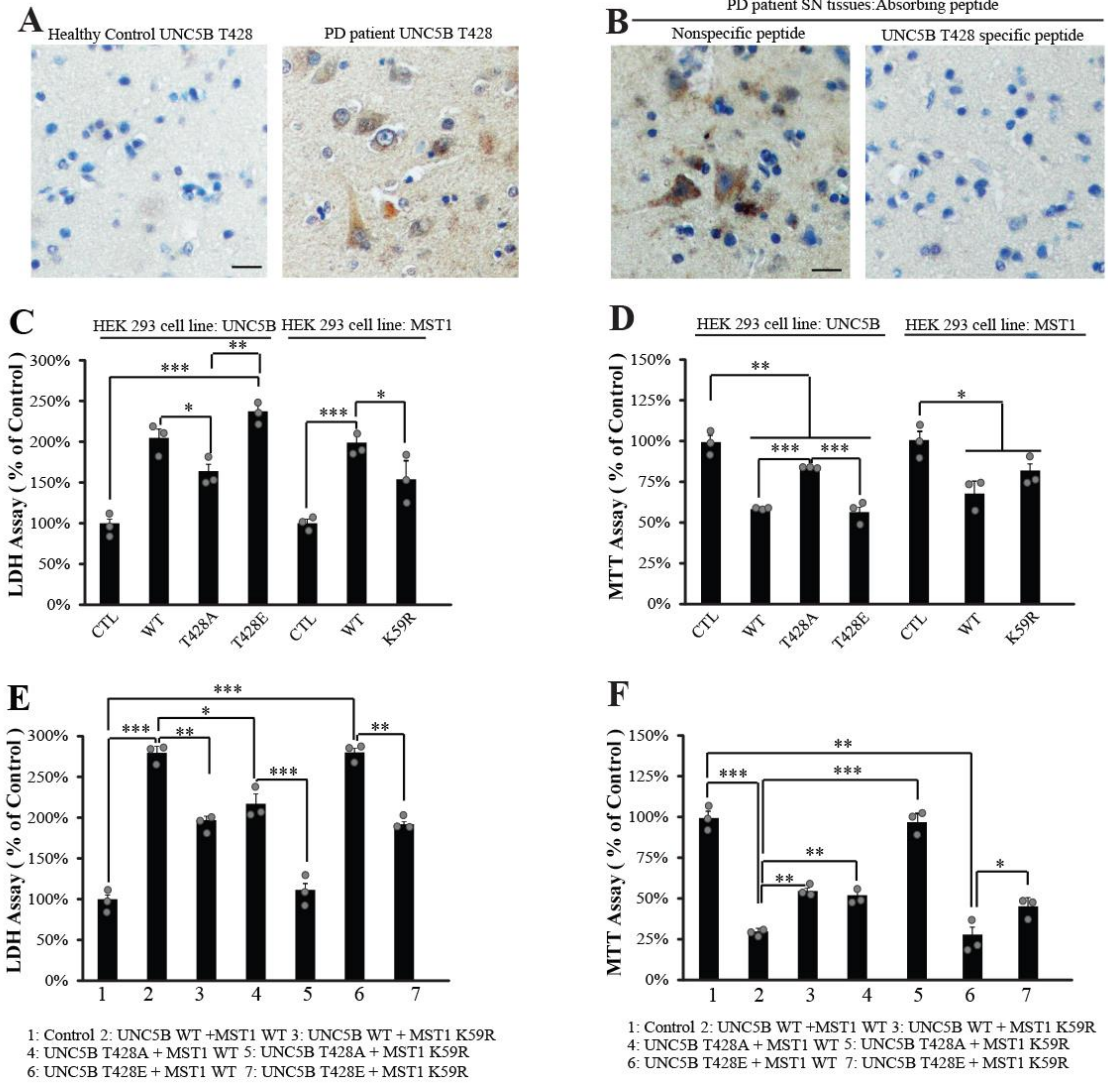

**Fig. S2. MST1 phosphorylation of UNC5B mediates its pro-apoptotic activity.**

**(A and B)** Immunohistochemistry shows increase of p-UNC5B T428 expression levels in PD patient's brain paraffin slides. Confirmation of the specificity of the anti-pUNC5B T428 antibody. The anti-pUNC5B T428 antibody was pre-incubated with a peptide containing pUNC5B T428 or non-specific peptide before immunohistochemistry. The signal was blocked by pUNC5B T428 peptide but not nonspecific peptide. Scale bar: 20  $\mu$ m. 3 independent blinder tests were conducted in all of experiments.

**(C and D)** The LDH assay (C) and MTT assay (D) showed the cytotoxicity and viability of different UNC5B WT, UNC5B T428A, UNC5B T428E, MST1 WT, or MST1 K59R constructs individually transfected human cells.

**(E and F)** MST1 phosphorylation of UNC5B mediates its pro-apoptotic effect. HEK293 cells co-transfected with various UNC5B and MST1 plasmids showed the cytotoxicity (E) and viability (F).

Error bars represent the mean  $\pm$  SEM. Statistical significance was determined using a two-way ANOVA followed by post hoc Bonferroni test for multiple group comparison.

\*p < 0.05; \*\*< 0.01; \*\*\*P < 0.001.

**Fig. S3.**

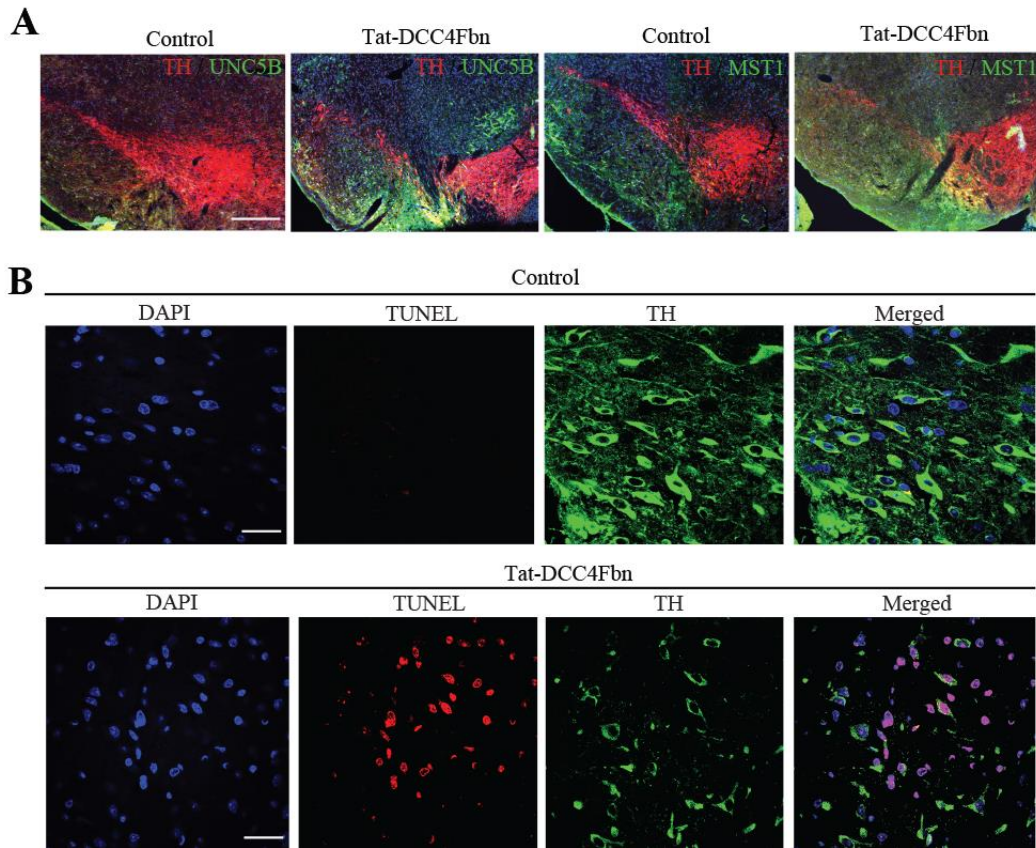

**Fig. S3. Tat-DCC-4Fbn robustly induces UNC5B and MST1 protein expressions in SN regions, triggering dopaminergic cell death**

(A) Immunofluorescent co-staining representative images showed that TH loss (Red) was correlated with the UNC5B (Green) or MST1 (Green) expression escalation in the SN region by DCC-4Fbn. Scale bar: 1000  $\mu$ m.

(B) Tat-DCC-4Fbn i.p. injection increases the TUNEL positive dopaminergic neuronal cells in mice. TUNEL (Red) and TH (Green) were co-stained on the brain sections. Scale bar: 50  $\mu$ m.

**Fig. S4.**

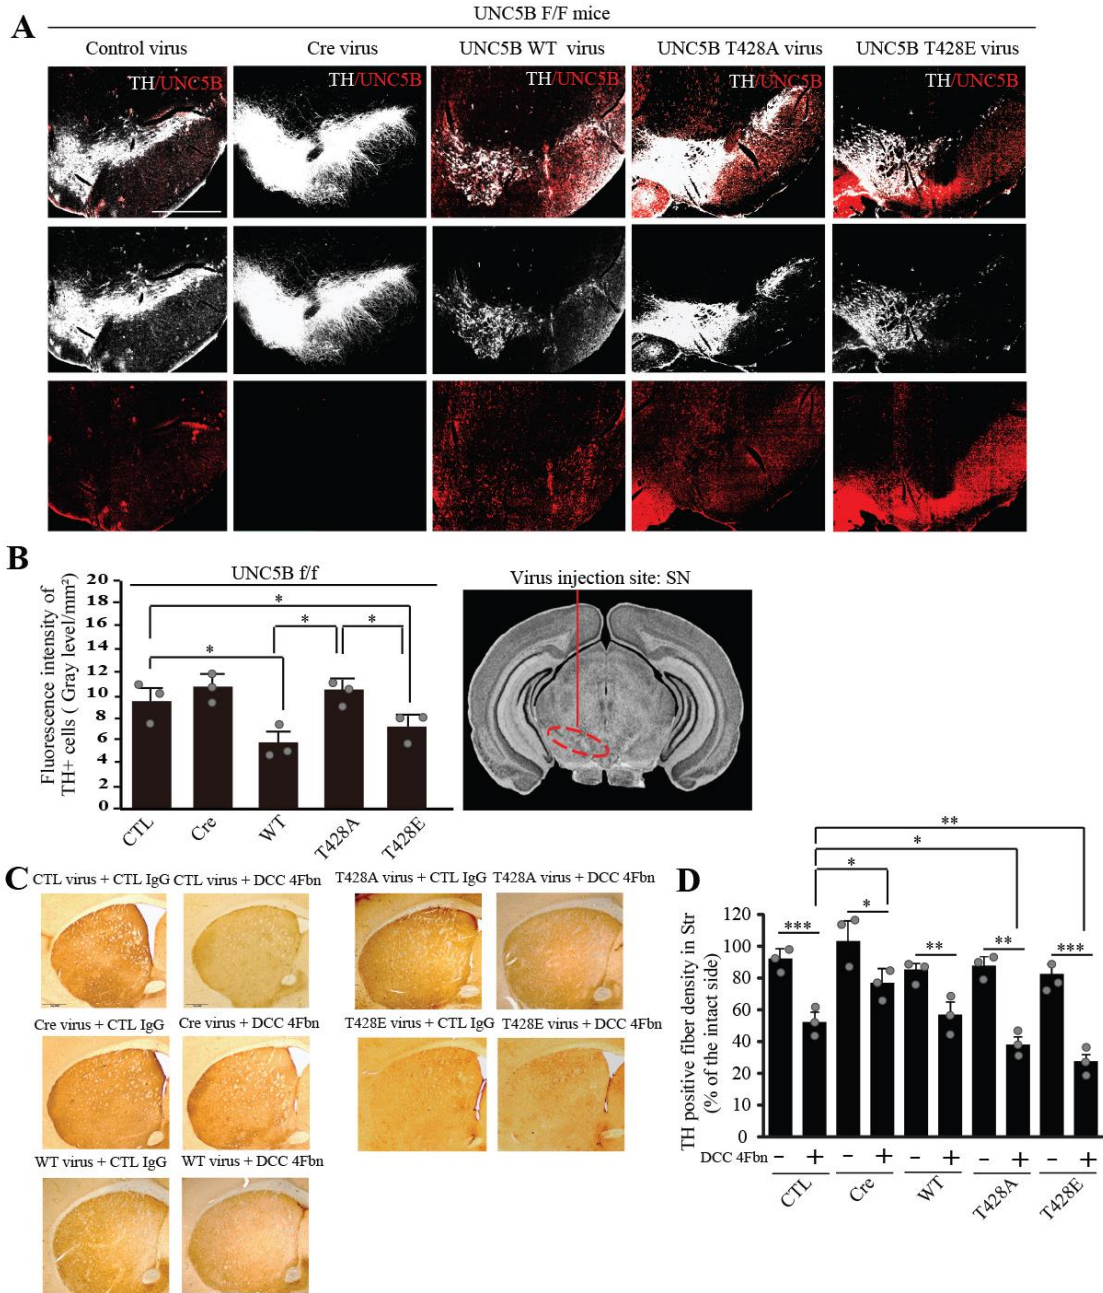

**Fig. S4. UNC5B phosphorylation by MST1 is required for initiating dopaminergic neuronal cell death in the SN and Striatum.**

(A) TH and UNC5B immunofluorescent co-staining shows that TH cell survival in SN region is mediated by pUNC5B T428 (Cy5-white:TH and Alexa 594-red: UNC5B). Scale bar: 1000  $\mu\text{m}$ . (B) The quantification bar graph of fluorescence intensity TH positive cells. N=3 independent experiments.

(C) TH immunohistochemistry images in the Striatum. Scale bar: 1000  $\mu\text{m}$ .

(D) Quantification bar graph of the density of TH-positive fibres in the striatum. N=3 independent experiments.

Error bars represent the mean  $\pm$  SEM. Statistical significance was determined using a two-way ANOVA followed by post hoc Bonferroni test for multiple group comparison.

\* $p < 0.05$ ; \*\* $< 0.01$ ; \*\*\* $P < 0.001$ .



**Fig. S5.**

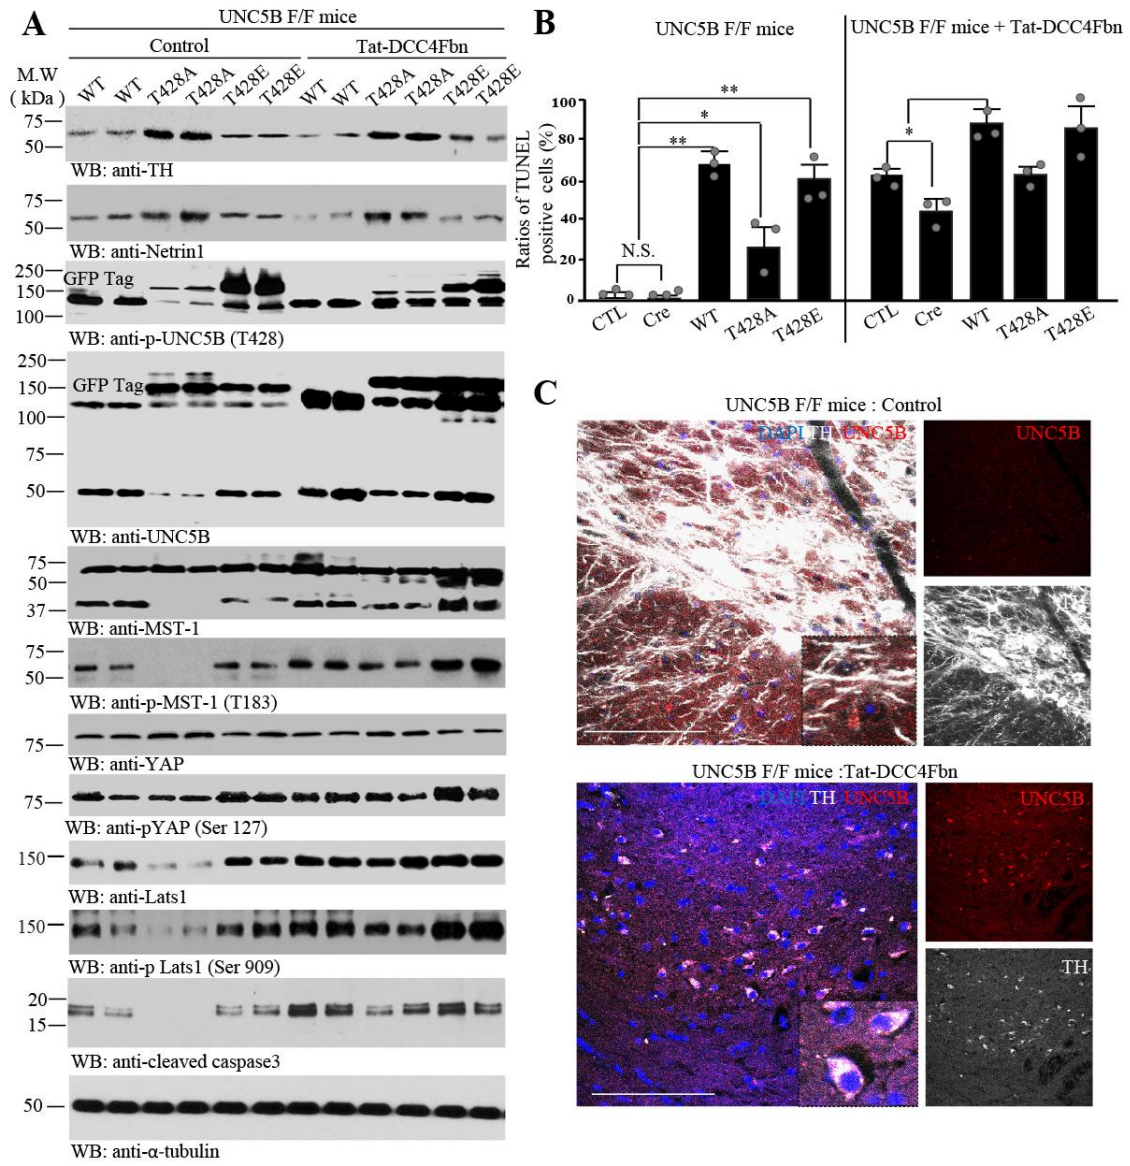

**Fig. S5. UNC5B phosphorylation by MST1 mediates dopaminergic cell apoptosis.**

(A) Unphosphorylated UNC5B T428A mutant loses its pro-apoptotic activity. Immunoblotting analysis of the SN brain tissue lysates with the following antibodies: TH, Netrin1, p-UNC5B T428, UNC5B, MST1, p-MST1 T183, YAP, p-YAP S127, LATS1, p-LATS1 S909 and active caspase-3 levels. UNC5B f/f mice were injected with 3 different UNC5B virus (UNC5B WT; UNC5B T428A; UNC5B T428E), followed by Tat-DCC 4Fbn or vehicle administration.

(B) The TUNEL assay quantification bar graph N =3 per group.

(C). Induction of UNC5B by netrin-1 deprivation elicits TH loss in the SN of UNC5B f/f mice. TH(White) and UNC5B(Red) immunofluorescent co-staining representative images from the mice with or without Tat-DCC 4Fbn i.p. injection. Scale bar: 50  $\mu$ m.

Error bars represent the mean  $\pm$  SEM. Statistical significance was determined using a two-way ANOVA followed by post hoc Bonferroni test for multiple group comparison.

\*p < 0.05; \*\*< 0.01; n.s., not significant.

**Fig. S6.**

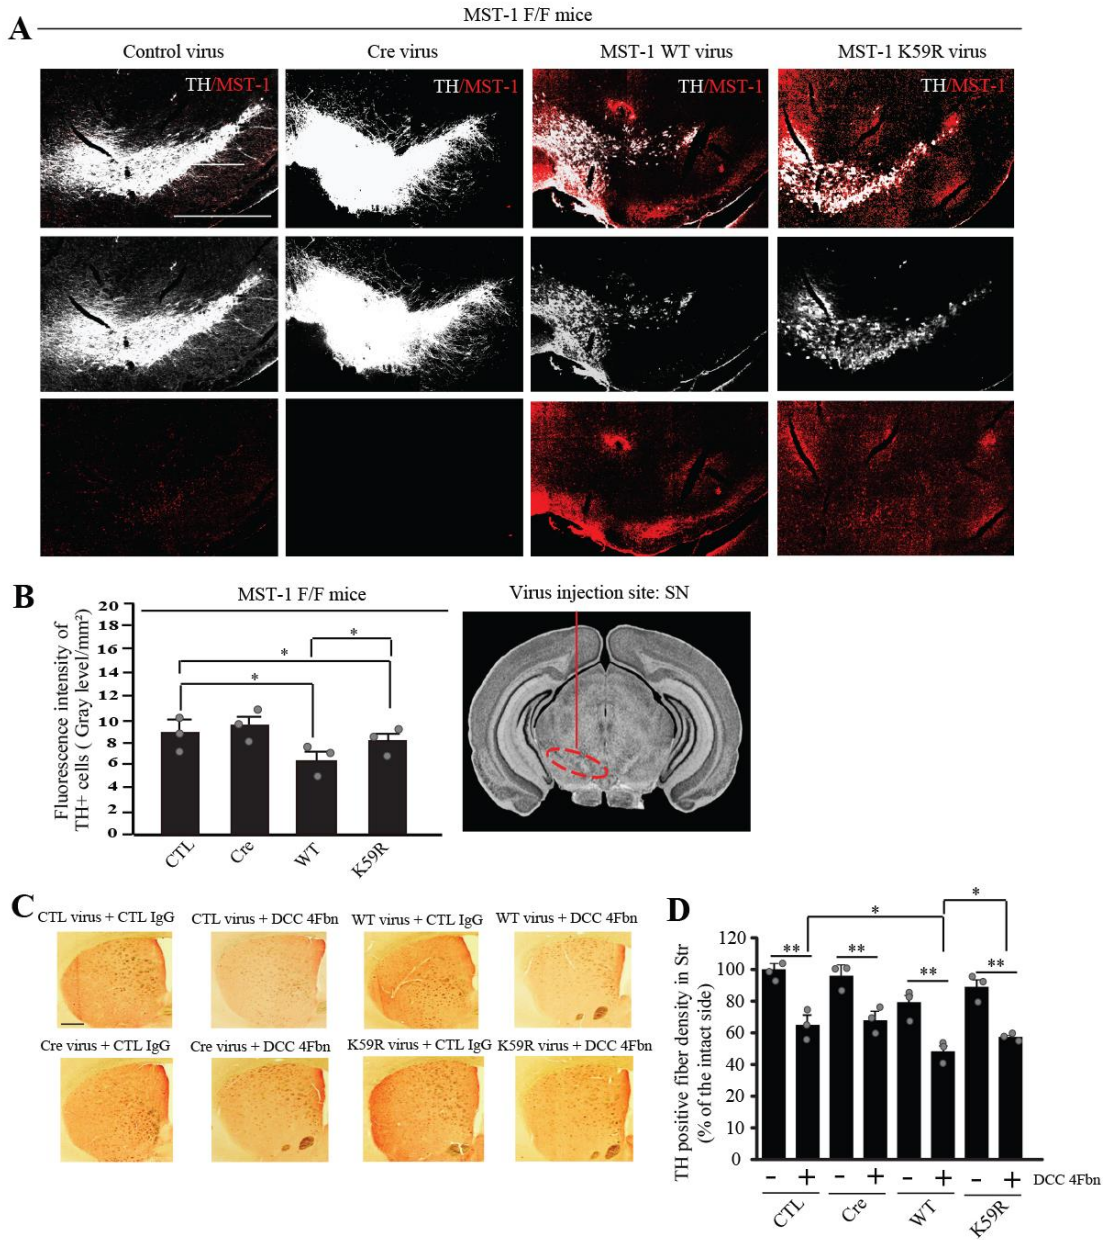

**Fig. S6. Kinase death of MST1 protects dopaminergic neuronal loss from DCC-4Fbn.**

(A) Kinase-dead MST1 K59R mutant fails to trigger dopaminergic neuronal loss. TH and MST1 immunofluorescent co-staining showed that TH neurons were protected in MST1 K59R virus injected group (Cy5-white:TH and Alexa 594-red: MST1). Scale bar: 1000  $\mu\text{m}$ .

(B) The quantification bar graph of fluorescence intensity TH positive cells (Results shown as mean  $\pm$  SEM; n=3 independent experiments, \*p<0.05 by two-way ANOVA).

(C) TH immunohistochemistry images in the Striatum from mice infected with various indicated virus, followed by DCC-4Fbn treatment. Scale bar: 1000  $\mu\text{m}$ .

(D) Quantification bar graph of the density of TH-positive fibres in the striatum. (Results shown as mean  $\pm$  SEM; n=3 independent experiments, \*p<0.05, \*\*p<0.01 by two-way ANOVA)

**Fig. S7.**

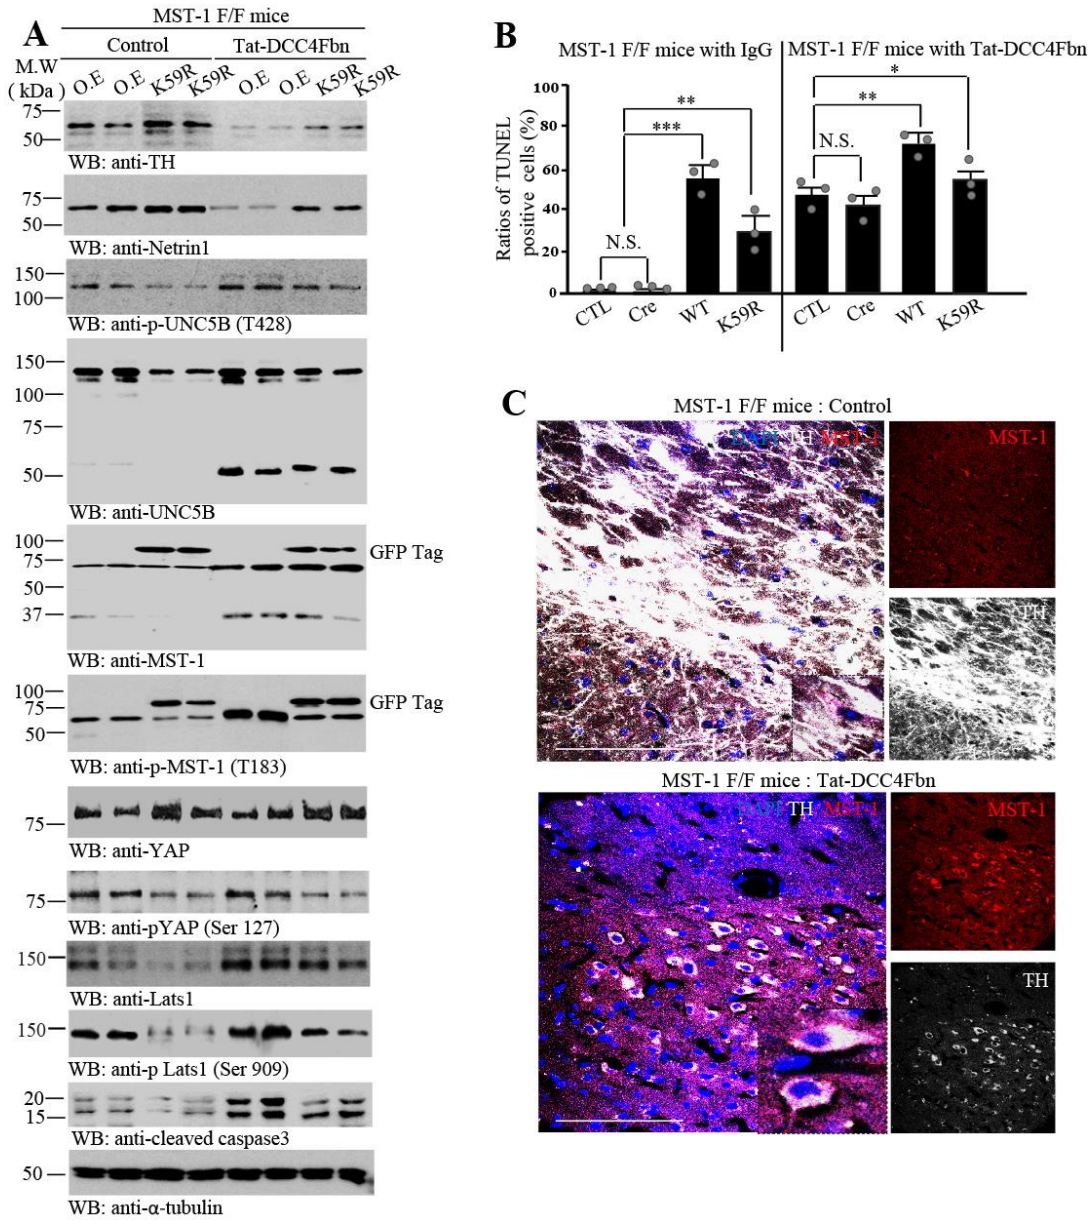

**Fig. S7. MST1 kinase activity is required for Netrin1 deprivation-elicited dopaminergic neuronal loss.**

(A) MST1 kinase-dead mutant (K59R) decreases dopaminergic neuronal loss from DCC-4Fbn treatment. Immunoblotting analysis of the SN brain tissues lysates with the following antibodies: TH, Netrin1, p-UNC5B T428, UNC5B, MST1, p-MST1 T183, YAP, p-YAP S127, LATS1, p-LATS1 S909 and active caspase-3 levels. MST1 f/f mice were injected with 2 different MST1 virus (MST1 WT and MST1 K59R) into the SN regions, treated with Tat-DCC 4Fbn or vehicle.

(B) The TUNEL assay quantification bar graph. We performed the 3 independent experiments.

(C) TH and MST1 immunofluorescent co-staining representative images from the SN region in MST1 f/f mice treated with or without Tat-DCC-4Fbn (i.p. injection). Scale bar: 50  $\mu$ m.

Error bars represent the mean  $\pm$  SEM. Statistical significance was determined using a two-way ANOVA followed by post hoc Bonferroni test for multiple group comparison.

\* $p < 0.05$ ; \*\* $< 0.01$ ; \*\*\* $P < 0.001$ ; n.s., not significant.
